# Supplementary material for: CTGF Triggers Rat Astrocyte Activation and Astrocyte-Mediated Inflammatory Response in Culture Conditions
Source: PubMed Central journal article supplement (PMC6717176; doi:10.1007/s10753-019-01029-7), 2019-06-10

# CTGF triggers rat astrocytes activation and astrocyte-mediated inflammatory response in culture conditions

**Sup Fig. 1.** Effects of CTGF on the secretion of neuroprotective factors. BDNF (a) and IGF-1 (b) in supernatants were assayed by ELISA. N.S., not significant.

**Sup Fig. 2.** Augmentation of inflammation by CTGF is abrogated by ASK1, p38 or JNK inhibitors. RA cells were treated with 10  $\mu$ M GS-4997, 5  $\mu$ M SB20358 or 25  $\mu$ M as indicated, for 30 minutes, prior to stimulate with CTGF or TGF- $\beta$ 1 for 24 h, and supernatants were collected to measure the production of cytokines—IL-6, IL-1 $\beta$  (a), TNF- $\alpha$  (c) and chemokines—CXCL1, RANTES(b). (d) Effects of ASK1 inhibition on the chemotactic migration of co-cultured PBMCs. \*:  $p < 0.05$ , \*\*:  $p < 0.01$ , \*\*\*:  $p < 0.001$ , N.S., not significant.

# Sup Fig. 1. Effects of CTGF on the secretion of neuroprotective factors.

**a**

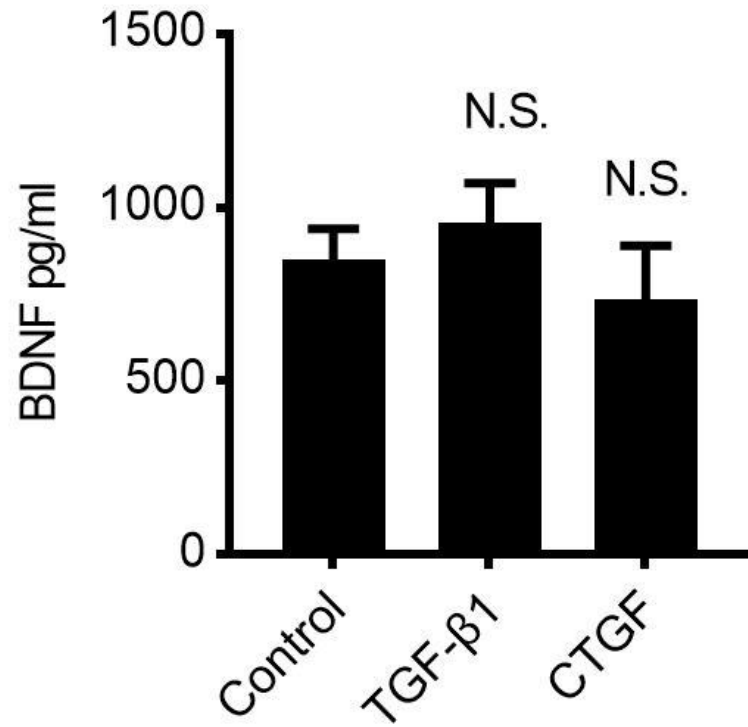

**b**

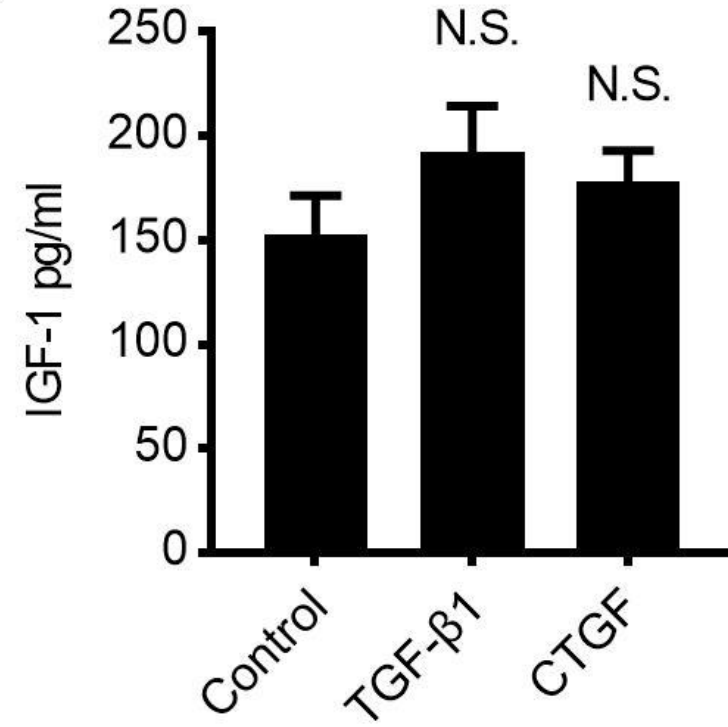

# Sup Fig. 2. Augmentation of inflammation by CTGF is abrogated by p38 or JNK inhibitors.

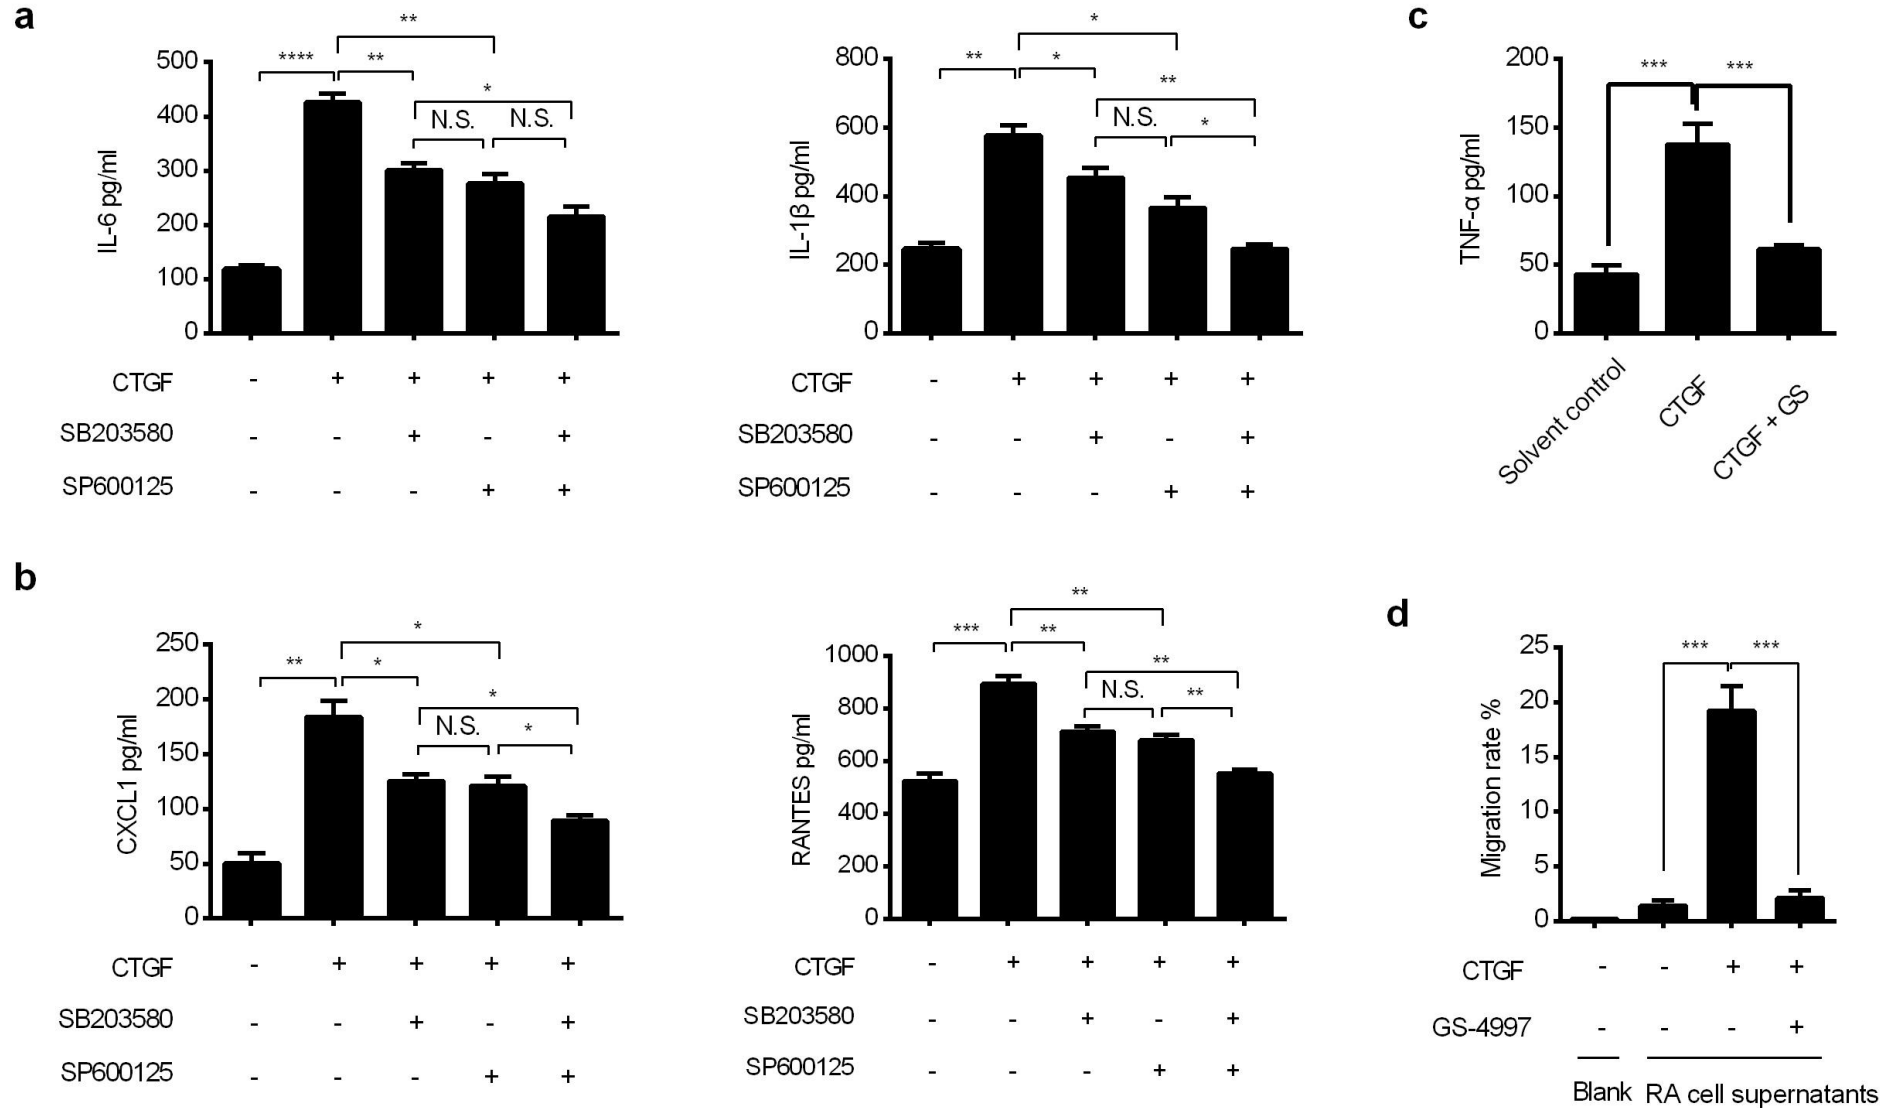

Supplement: 10753_2019_1029_MOESM1_ESM.pdf [file 10753_2019_1029_MOESM1_ESM.pdf]
