# Supplementary material for: CTGF Triggers Rat Astrocyte Activation and Astrocyte-Mediated Inflammatory Response in Culture Conditions
Source: PubMed Central journal article supplement (PMC6717176; doi:10.1007/s10753-019-01029-7), 2019-06-10
Supplement: 10753_2019_1029_MOESM2_ESM.pdf [file 10753_2019_1029_MOESM2_ESM.pdf]

*Table S1.* Primer sequences for qRT-PCR.

| Primers     | Sequences(5'-3')        |
|-------------|-------------------------|
| Rat CTGF-F  | GGAAATGCTGTGAGGAGTGG    |
| Rat CTGF-R  | TGGCTCGCATCATAGTTGGG    |
| Rat GFAP-F  | GAGAACAACCTGGCTGTGTA    |
| Rat GFAP-R  | TCTTGATGTTACTGGTGGC     |
| Rat IL-6 F  | AGCGATGATGCACTGTCAGA    |
| Rat IL-6 R  | AGCGATGATGCACTGTCAGA    |
| Rat GAPDH-F | GATGACATCAAGAAGGTGGTGA  |
| Rat GAPDH-R | ACCCTGTTGCTGTAGCCATATTC |
